# Supplementary material for: Tunable spin-polarized band gap in Si2/NiI2 vdW heterostructure
Source: Royal Society of Chemistry journal article supplement (doi:10.1039/c9ra10199c), 2020-01-01
Supplement: c9ra10199c1.pdf [file c9ra10199c1.pdf]

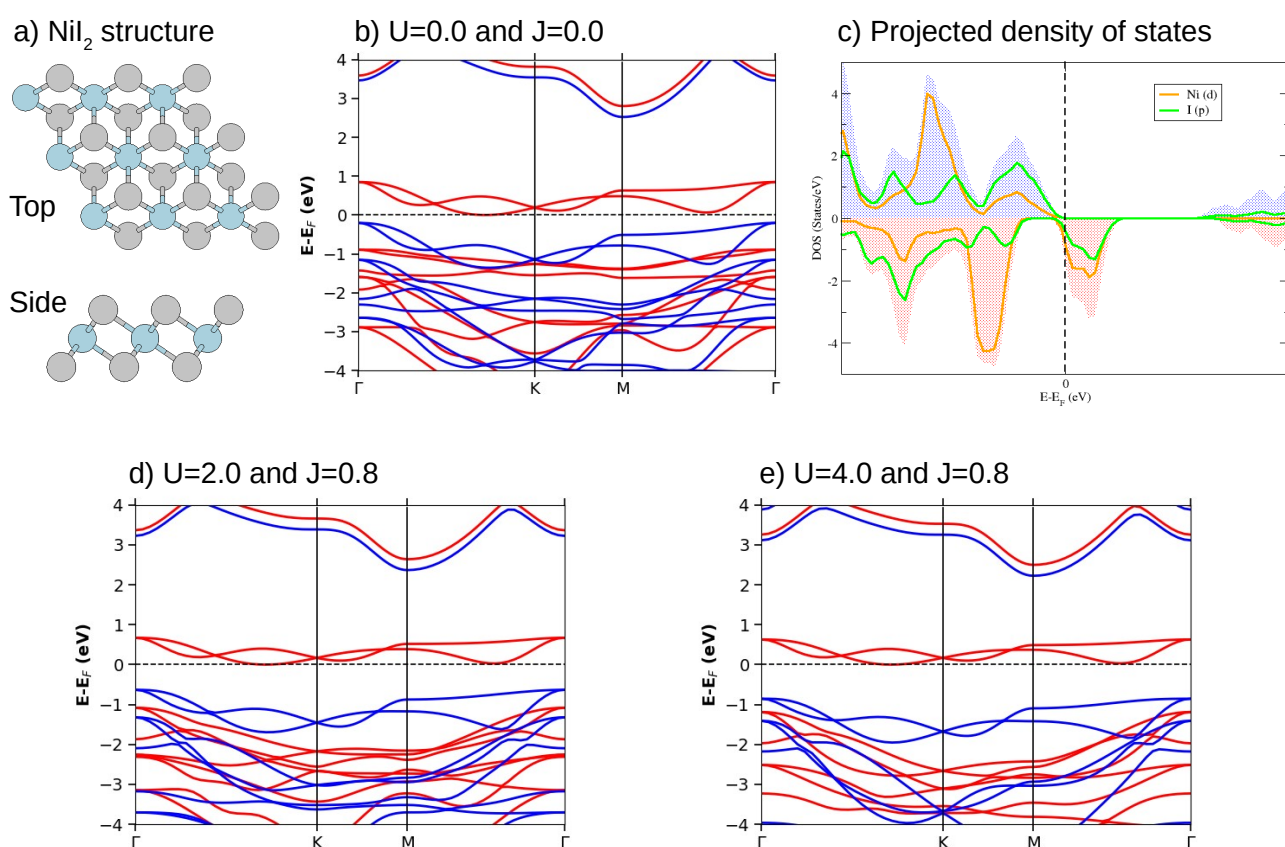

Fig. 1 Figure (a) is top and side view of  $\text{NiI}_2$  structure. Figure (b) is standard electronic band structure and figure (c) is the projected band structure, where orange line is the d orbital of Ni and the green line is the p orbital of I. Figures (d) and (e) are the electronic band structure of  $\text{NiI}_2$  with Hubbard correction, where  $U=2$  and  $J=0.8$  and  $U=4$  and  $J=0.8$ , respectively.

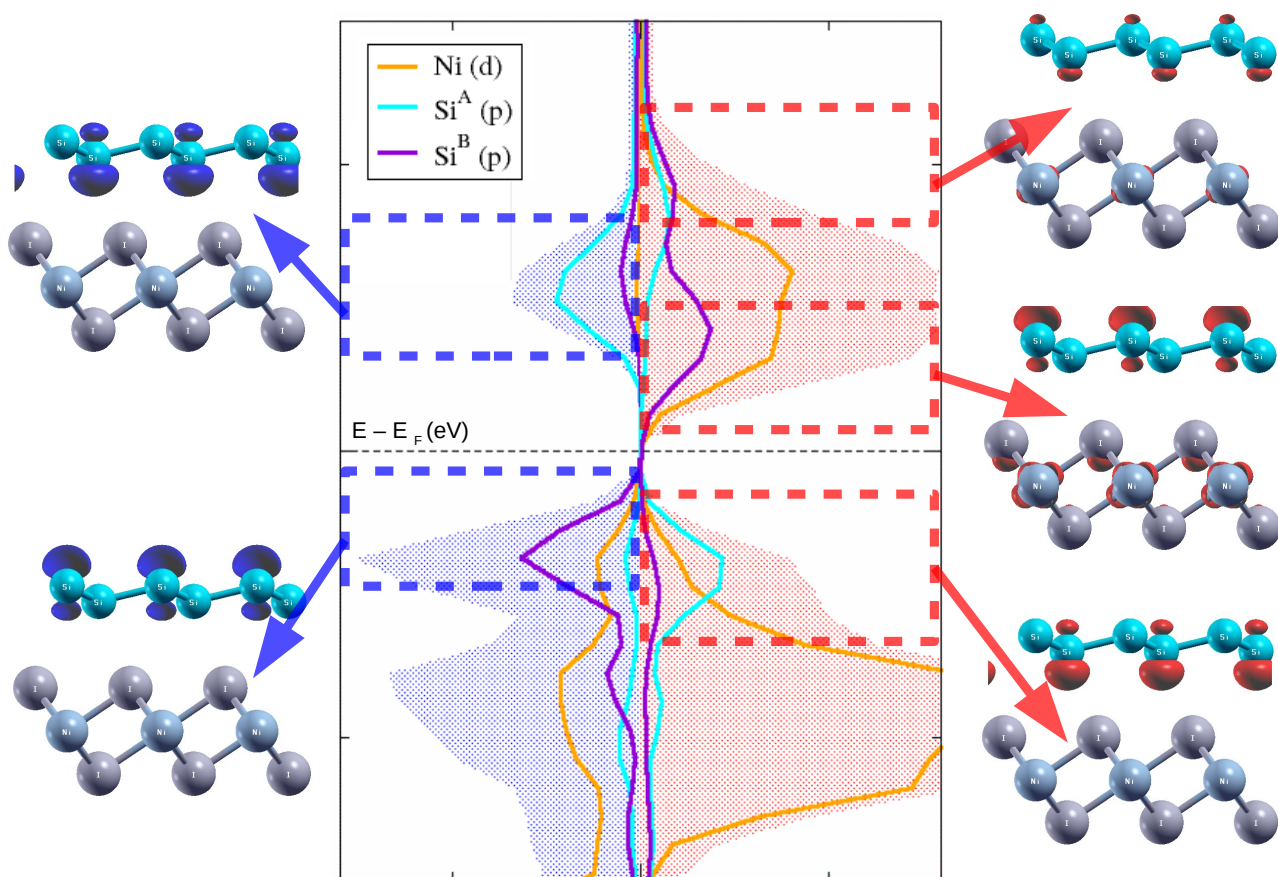

Fig. 2 PDOS of the vdW heterostructure. We also show the electronic charge density for the peak in the valence band and conduction band near to the Energy Fermi.

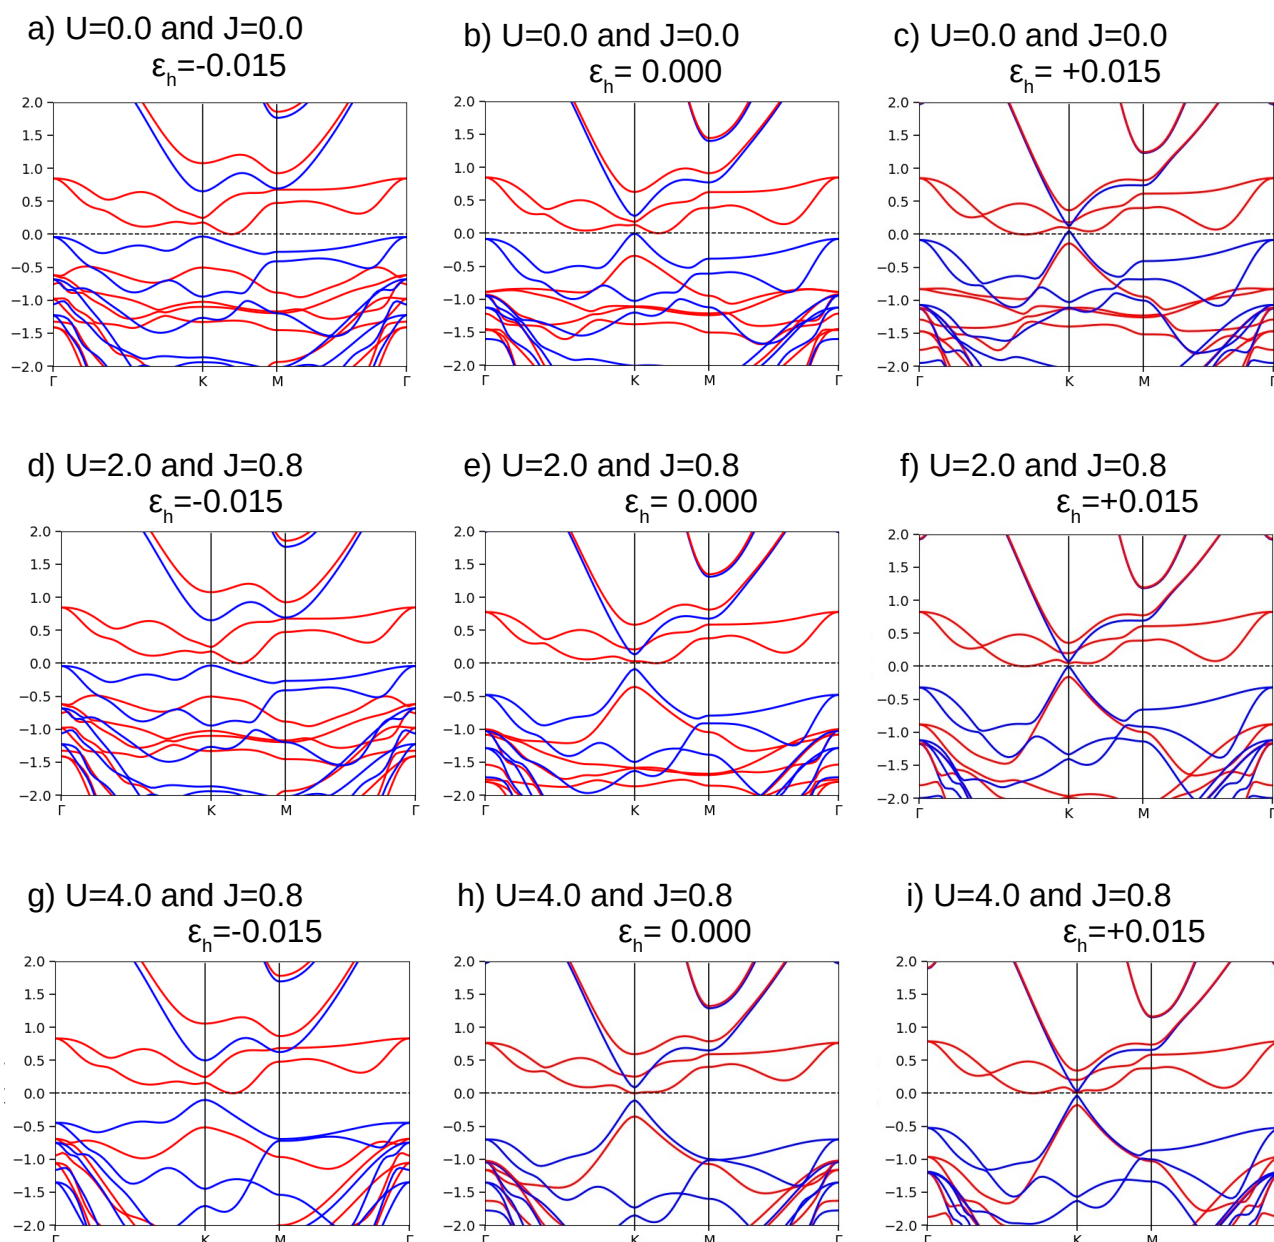

Fig. 3 Electronic band structure for the vdW heterostructures for different values of  $U$  and  $J$  under vertical strain.
